# Supplementary material for: Identification of a new class of proteasome inhibitors based on a naphthyl–azotricyclic-urea–phenyl scaffold
Source: Royal Society of Chemistry journal article supplement (doi:10.1039/d2md00404f), 2023-01-01
Supplement: d2md00404f1.pdf [file d2md00404f1.pdf]

*RSC Medicinal Chemistry*  
*Supplementary Data*

Identification of a new class of proteasome  
inhibitors based on a naphthyl-azotricyclic-urea-  
phenyl scaffold

Duncan Allardyce, Priscilla Adu Mantey, Monika Szalecka, Robert  
Nkwo, Eriketi Z. Loizidou\*

Middlesex University, Faculty of Science and Technology, Department of  
Natural Sciences, The Burroughs, London, NW4 4BT, United Kingdom

\*Author to whom correspondence should be addressed:

Dr Eriketi Z. Loizidou, Middlesex University, Department of Natural Sciences,  
The Burroughs, NW4 4BT, London, UK; [e.loizidou@mdx.ac.uk](mailto:e.loizidou@mdx.ac.uk)

**Table S1.** Molecular docking results from top 20 scoring ligands from initial screening with Autodock Vina and further analysis with Autodock 4.2 against the  $\beta$ 5c active site of the proteasome. Argyrin B, a reversible inhibitor of the proteasome was used as control.

| ZINC ID     | Autodock Vina<br>Binding energy<br>(Kcal/mol) | Autodock 4.2<br>Binding energy (Kcal/mol) |                        |                        |        |
|-------------|-----------------------------------------------|-------------------------------------------|------------------------|------------------------|--------|
|             |                                               | 1 <sup>st</sup><br>run                    | 2 <sup>nd</sup><br>run | 3 <sup>rd</sup><br>run | Mean   |
| ZINC4270569 | -11.3                                         | -8.23                                     | -8.22                  | -7.99                  | -8.15  |
| ZINC5411973 | -10.8                                         | -8.44                                     | -7.81                  | -7.36                  | -7.87  |
| ZINC4098367 | -10.7                                         | -6.95                                     | -7.41                  | -7.66                  | -7.34  |
| ZINC4259483 | -10.6                                         | -9.39                                     | -9.45                  | -9.09                  | -9.31  |
| ZINC4201115 | -10.4                                         | -9.91                                     | -9.95                  | -11.02                 | -10.29 |
| ZINC4258888 | -10.4                                         | -11.30                                    | -11.27                 | -11.30                 | -11.29 |
| ZINC4259440 | -10.3                                         | -8.20                                     | -8.18                  | -8.43                  | -8.27  |
| ZINC4259794 | -10.3                                         | -10.20                                    | -10.13                 | -9.5                   | -9.94  |
| ZINC5433649 | -10.3                                         | -10.07                                    | -10.09                 | -10.31                 | -10.16 |
| ZINC4235436 | -10.2                                         | -8.92                                     | -8.4                   | -9.11                  | -8.81  |
| ZINC5413755 | -10.2                                         | -9.72                                     | -9.32                  | -10.15                 | -9.73  |
| ZINC4235418 | -10.1                                         | -6.98                                     | -9.01                  | -9.24                  | -8.41  |
| ZINC4259443 | -10.1                                         | -10.02                                    | -10.11                 | -10.30                 | -10.14 |
| ZINC4259861 | -10.1                                         | -9.89                                     | -10.73                 | -9.81                  | -10.14 |
| ZINC5396040 | -10.1                                         | -7.61                                     | -6.8                   | -6.38                  | -6.93  |
| ZINC5399419 | -10.1                                         | -9.16                                     | -8.91                  | -9.29                  | -9.12  |
| ZINC5398884 | -10                                           | -6.63                                     | -7.09                  | -6.30                  | -6.67  |
| ZINC5399237 | -10                                           | -8.33                                     | -8.92                  | -10.89                 | -9.38  |
| ZINC5413761 | -10                                           | -10.36                                    | -10.43                 | -10.62                 | -10.47 |
| ZINC5434032 | -10                                           | -8.57                                     | -7.57                  | -7.55                  | -7.90  |
| ARGYRIN B   | -9.4                                          | -8.09                                     | -8.10                  | -8.09                  | -8.10  |

**Table S2.** Summary of estimated binding energies and inhibition constants at the active sites of the constitutive proteasome ( $\beta$ 1c,  $\beta$ 2c and  $\beta$ 5c) and immunoproteasome ( $\beta$ 1i,  $\beta$ 2i and  $\beta$ 5i) as determined from molecular modeling.

| Compound | Estimated average binding energy (Kcal/mol) |            |            |            |            |            |
|----------|---------------------------------------------|------------|------------|------------|------------|------------|
|          | $\beta$ 1c                                  | $\beta$ 1i | $\beta$ 2c | $\beta$ 2i | $\beta$ 5c | $\beta$ 5i |
| C1       | -12.08                                      | -12.11     | -13.89     | -11.08     | -11.43     | -11.34     |
| C2       | -11.24                                      | -10.53     | -11.70     | -11.02     | -11.13     | -10.98     |
| C3       | -11.13                                      | -10.87     | -11.95     | -11.17     | -11.18     | -10.62     |
| C4       | -11.16                                      | -11.17     | -10.94     | -11.05     | -10.81     | -10.94     |
| C5       | -9.68                                       | -9.43      | -10.10     | -9.55      | -10.09     | -9.42      |
| C6       | -11.65                                      | -10.30     | -11.20     | -10.10     | -8.82      | -10.26     |
| C7       | -9.60                                       | -9.99      | -9.64      | -9.09      | -10.11     | -10.05     |
| C8       | -9.94                                       | -9.73      | -10.86     | -9.92      | -8.60      | -9.27      |
| C9       | -10.16                                      | -11.0      | -10.91     | -11.08     | -9.38      | -9.92      |
| Compound | Estimated average inhibition constant (nM)  |            |            |            |            |            |
|          | $\beta$ 1c                                  | $\beta$ 1i | $\beta$ 2c | $\beta$ 2i | $\beta$ 5c | $\beta$ 5i |
| C1       | 1.40                                        | 1.33       | 0.07       | 7.60       | 4.21       | 4.89       |
| C2       | 5.79                                        | 11.43      | 2.66       | 8.35       | 6.93       | 8.90       |
| C3       | 6.92                                        | 10.81      | 1.77       | 6.45       | 6.34       | 16.55      |
| C4       | 6.65                                        | 6.48       | 9.65       | 7.90       | 11.86      | 9.64       |
| C5       | 80.37                                       | 122.2      | 68.52      | 99.22      | 40.18      | 187.07     |
| C6       | 2.90                                        | 28.32      | 6.21       | 39.22      | 343.73     | 333.63     |
| C7       | 92.01                                       | 47.76      | 106.97     | 216.91     | 38.52      | 125.83     |
| C8       | 51.33                                       | 73.68      | 10.95      | 56.13      | 494.94     | 2830       |
| C9       | 35.78                                       | 8.65       | 10.05      | 7.66       | 220.37     | 169.09     |

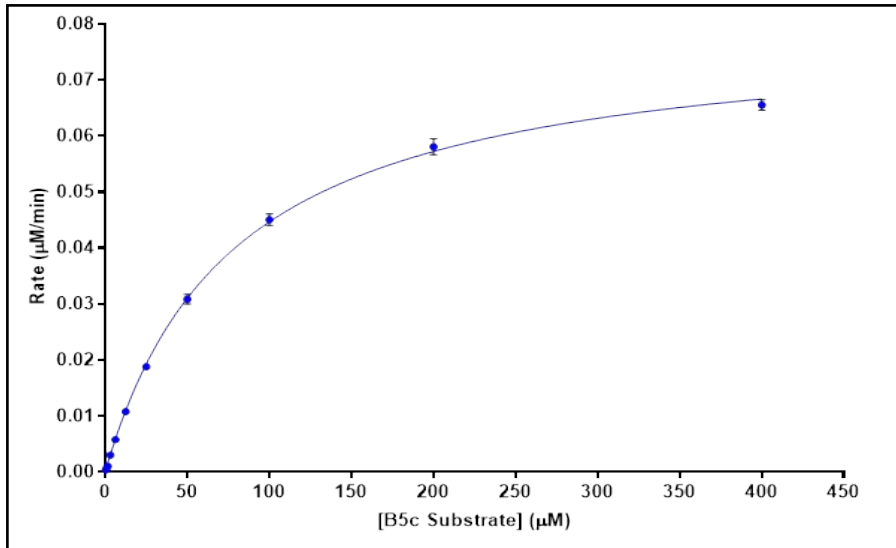

**Figure S1.** Michaelis Menten kinetics SNLR plot of Suc-LLVY-AMC liberation (SEM error bars) at  $\beta 5c$ . Enzyme concentration was constant at 1 nM and a range of substrate concentrations were used.  $K_m$  was determined using Michaelis-Menten least squares fit according to model  $Y = V_{max} * X / (K_m + X)$ , which showed  $K_m = 78.4 \mu M$ , 95% CI 72.3-85.0  $\mu M$ , (n=3).

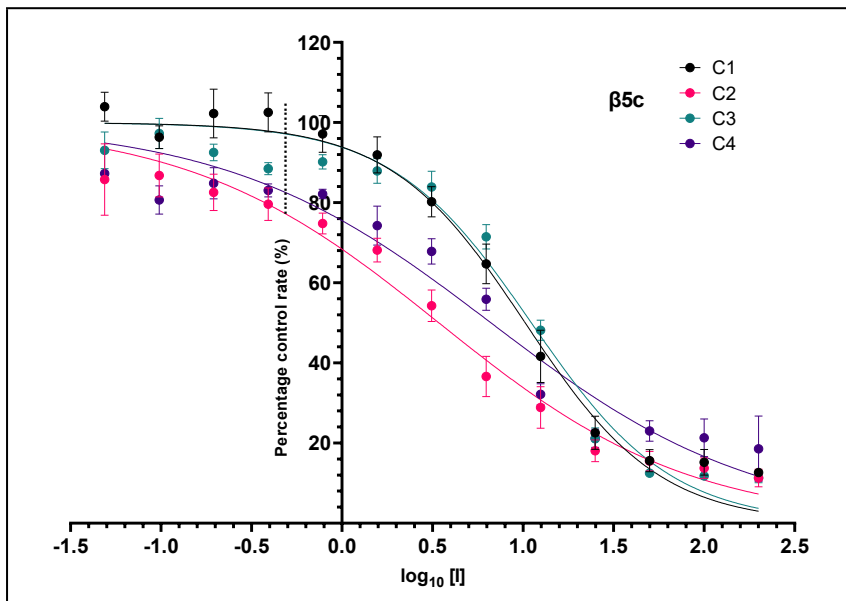

**Figure S2.**  $IC_{50}$  plots at  $\beta 5c$  site. Logarithmic concentration of C1-4 against percentage control, initial rate velocity. Tested at 1nM proteasome enzyme concentration,  $[S] = K_m$  ( $K_m$  values:  $\beta 5c = 78.4 \mu M$ ) and compound concentration within 0.01-200  $\mu M$  (using 1:1 serial dilution).

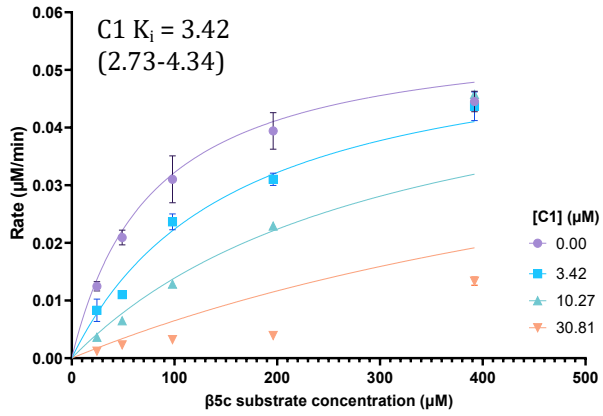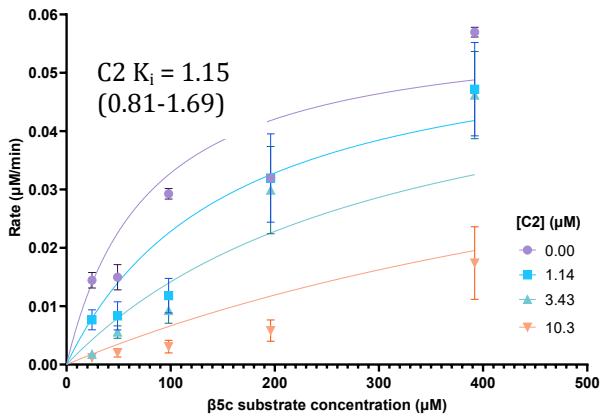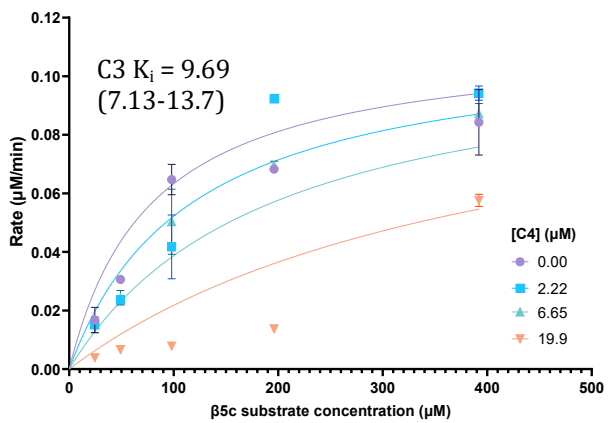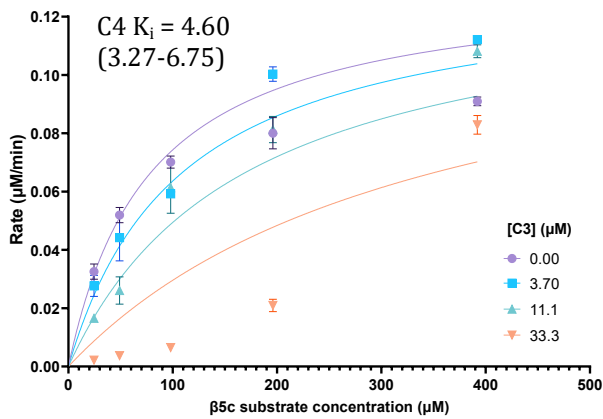

**Figure S3.** Kinetic enzyme inhibition studies of C1-4 at  $\beta 5c$  site.  $K_i$  estimation from competitive fit SNLR analysis at  $\beta 5c$ : C1 =  $3.42\mu\text{M}$ , C2 =  $1.15\mu\text{M}$ , C3 =  $9.69\mu\text{M}$ , C4 =

4.60 $\mu$ M reported alongside 95% CI. Inhibitor concentrations [I] at ranges relative to IC<sub>50</sub>: x3, x1, x0.033.

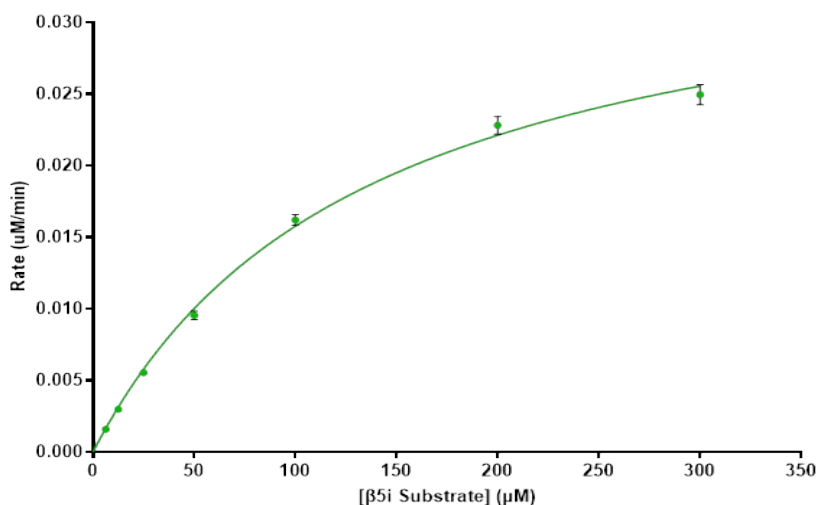

**Figure S4.** Michaelis-Menten kinetics SNLR plot of Suc-LLVY-AMC liberation (SEM error bars) at  $\beta$ 5i. Enzyme concentration was constant at 3 nM and a range of substrate concentrations were used.  $K_m$  was determined using Michaelis-Menten least squares fit according to model  $Y = V_{max} \cdot X / (K_m + X)$ , which showed  $K_m = 135 \mu\text{M}$ , 95% CI 117.5-155.8  $\mu\text{M}$ ,  $n=3$ .

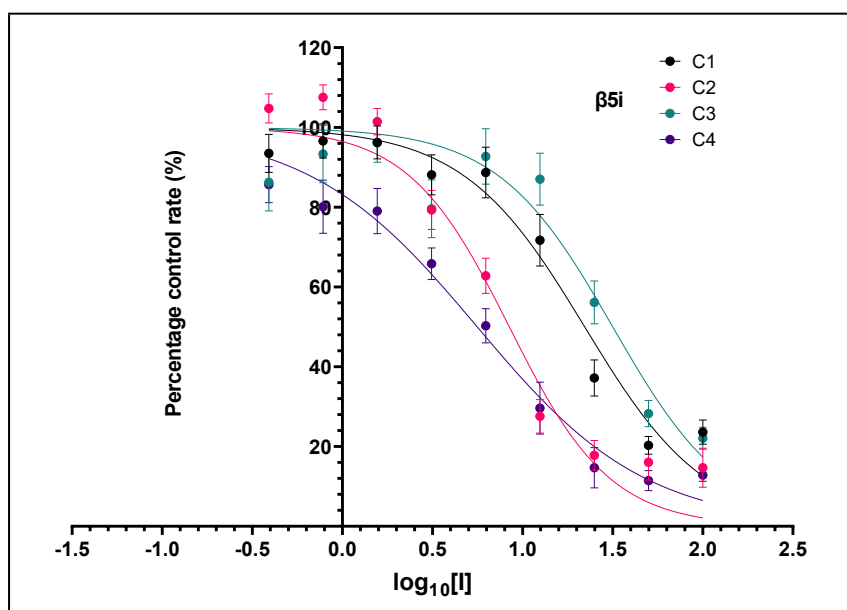

**Figure S5.** IC<sub>50</sub> plots at  $\beta$ 5i site. Logarithmic concentration of C1-4 against percentage control, initial rate velocity. Tested at 3nM immunoproteasome enzyme concentration,  $[S] = K_m$  ( $K_m$  values:  $\beta$ 5i = 135.0  $\mu\text{M}$ ) and compound concentration within 0.4-200  $\mu\text{M}$  (using 1:1 serial dilution).

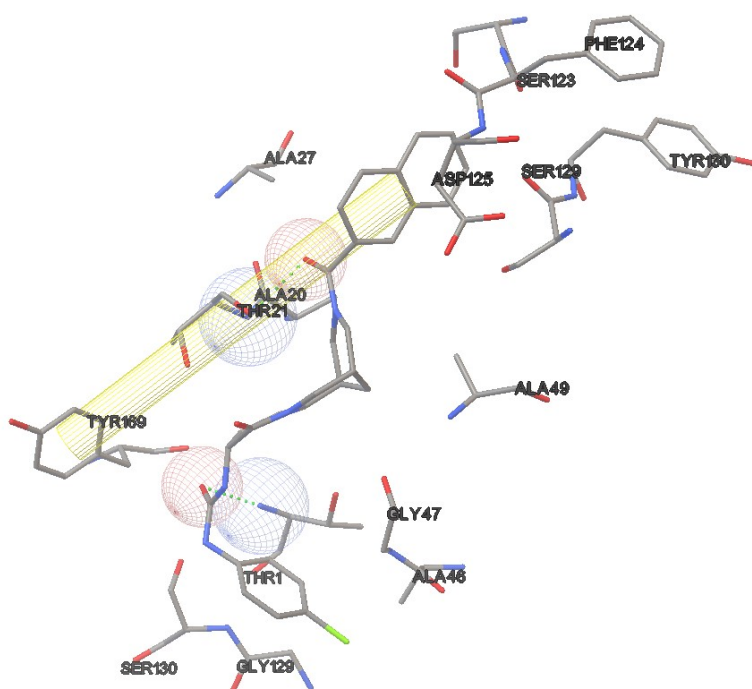

**Figure S6.** Autodock image of best docked conformation of C2 within  $\beta 5c$  showing all interactions. Hydrogen bonding interactions are shown as spheres as well as dotted green lines and pi-pi stacking interactions as yellow cylinders.

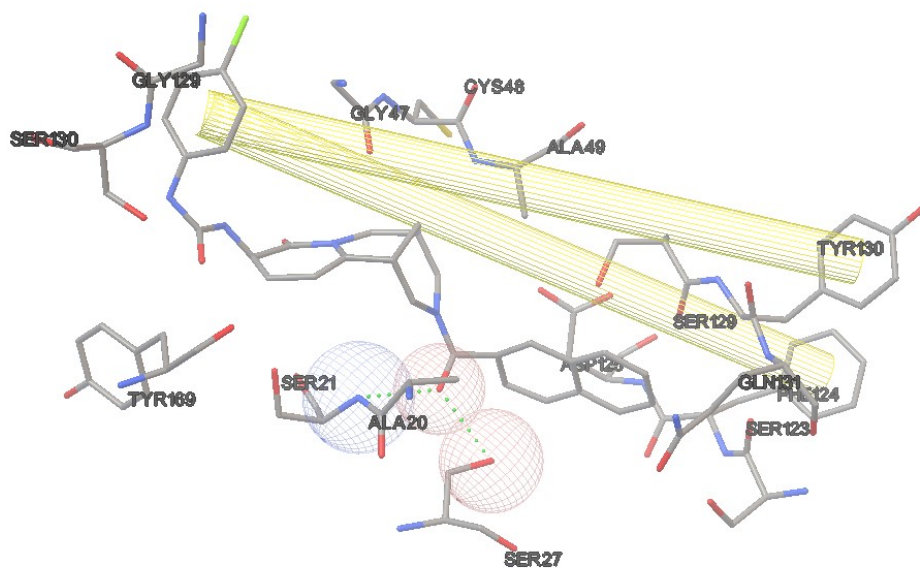

**Figure S7.** Autodock image of best docked conformation of C2 within  $\beta 5i$  showing all interactions. Hydrogen bonding interactions are shown as spheres as well as dotted green lines and pi-pi stacking interactions as yellow cylinders.

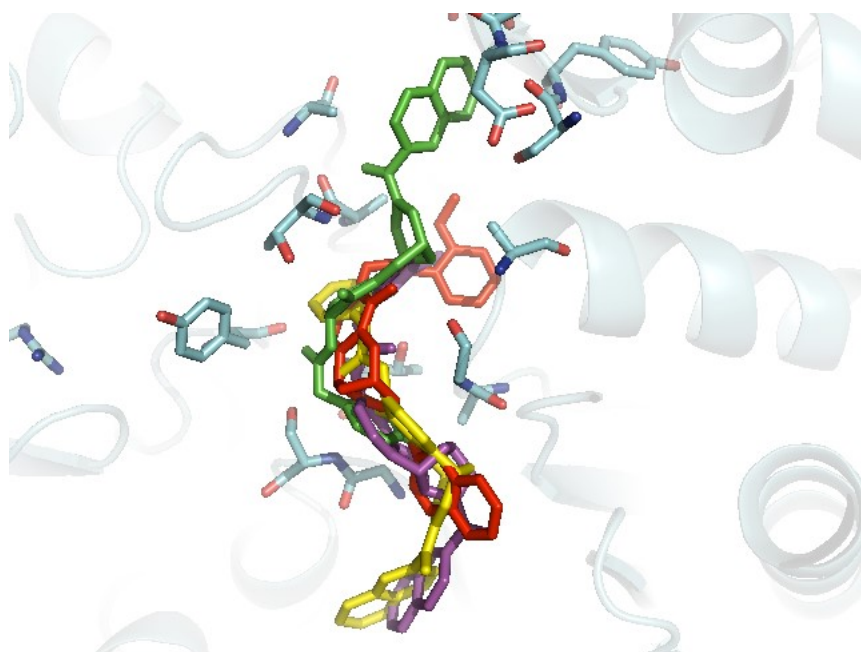

**Figure S8.** Overlay of C1 (magenta), C2 (green), C3 (yellow), C4 (red) best docked conformations within the  $\beta 5c$  active site.

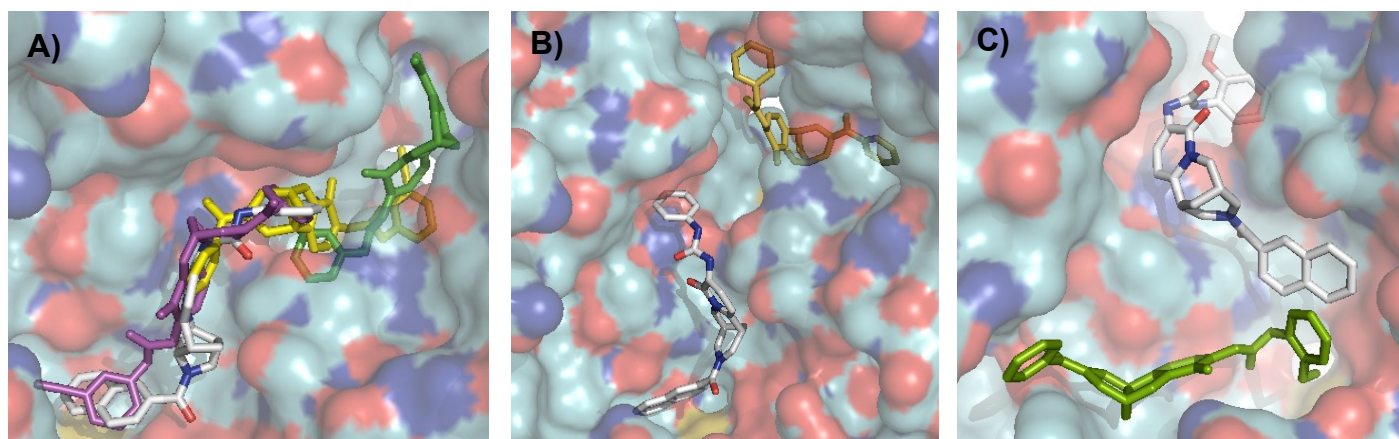

**Figure S9.** Overlay of A) C1 (grey), 5 (green), 6 (yellow), 9 (magenta), B) C3 (grey) and C7 (yellow) and C) C4 (grey) and C8 (lime green) within  $\beta 5c$ .



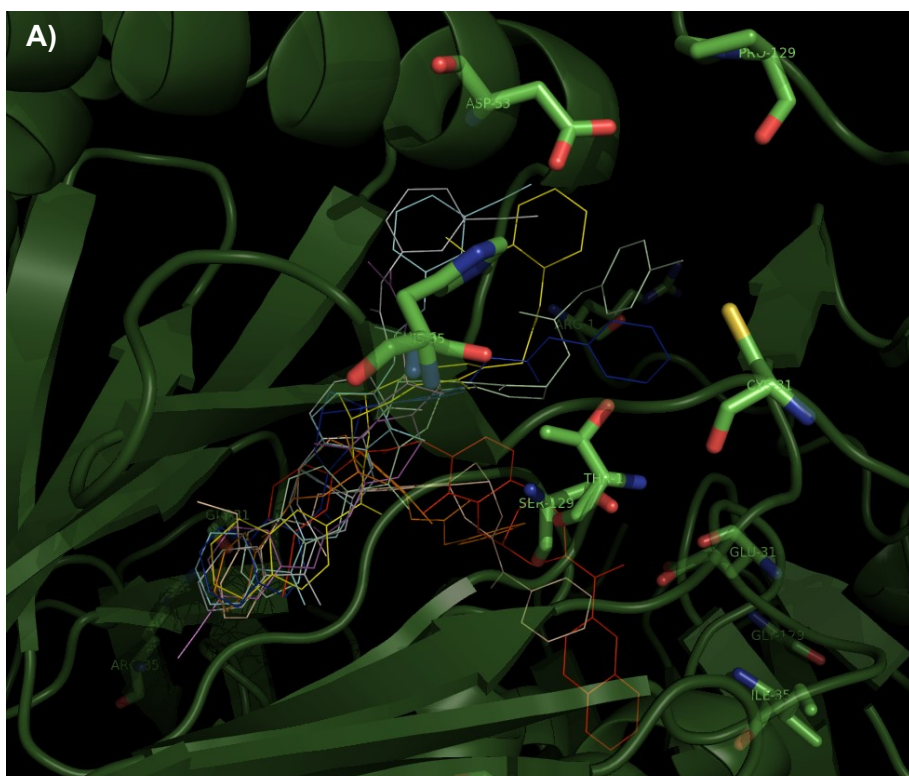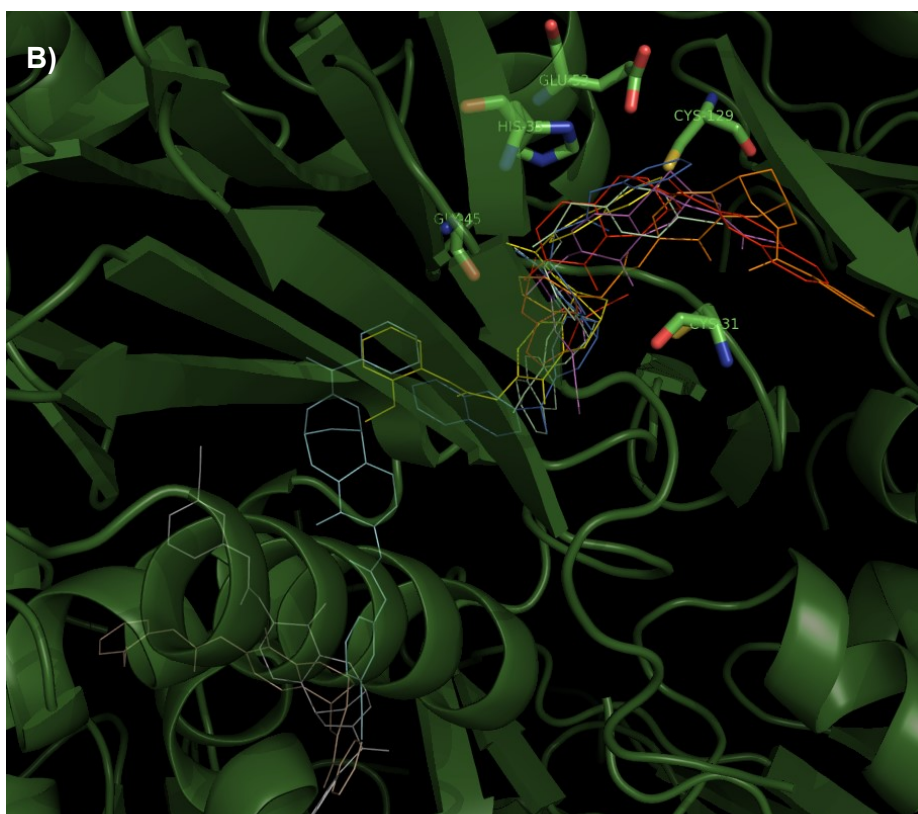

**Figure S10.** Overlay of best docked conformations of C1-9 at the A)  $\beta$ 2c and B)  $\beta$ 2i active sites. S1 pocket amino acids G45, C31, H35, D53 ( $\beta$ 2), E53 ( $\beta$ 2i), C129 are shown as green stick representations. C1-9 are shown as line representations C1 (red), C2 (green), C3 (blue), C4 (yellow), C5 (magenta), C6 (cyan), C7 (orange), C8 (wheat), C9 (grey).

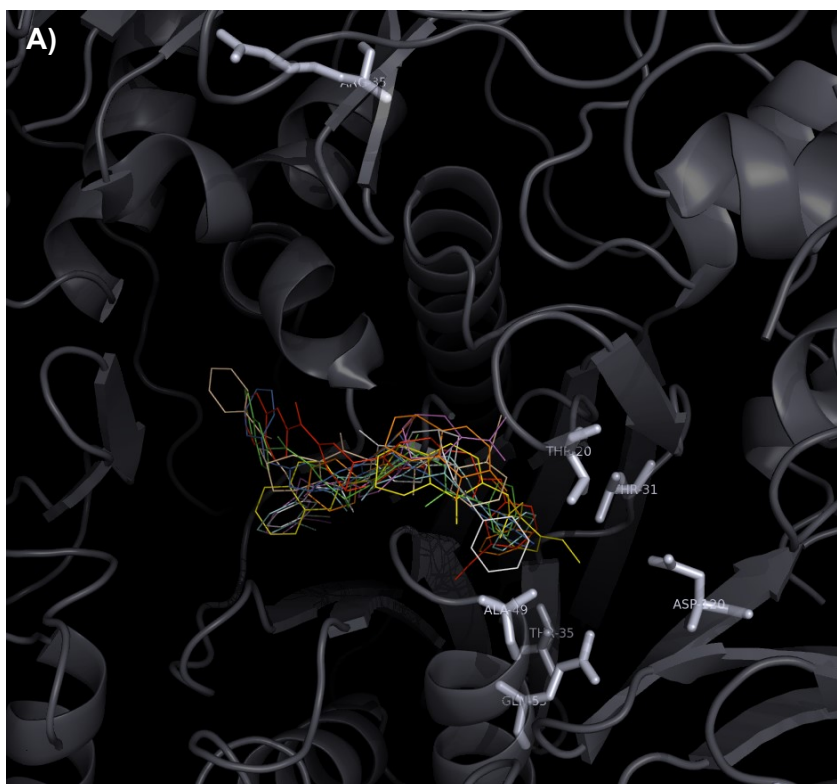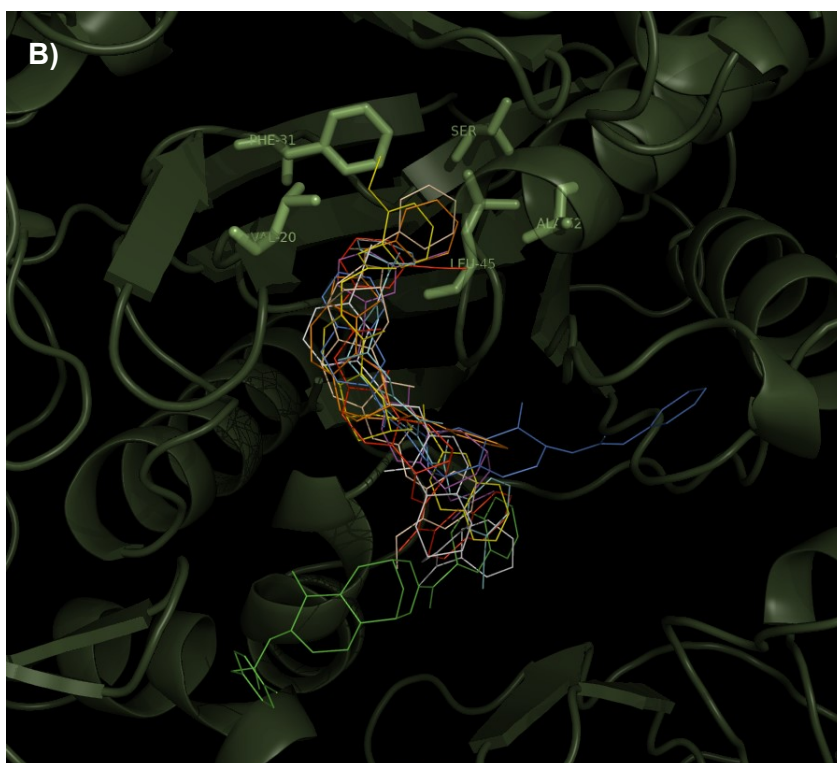

**Figure S11.** Overlay of best docked conformations of C1-9 at the A)  $\beta 1c$  and B)  $\beta 1i$  active sites. S1 pocket amino acids T20, T31, T35, R45, A49, Q53, D120 ( $\beta 1$ ), V20, F31, L45, A52 ( $\beta 1i$ ) are shown as stick representations. C1-9 are shown as line representations C1 (red), C2 (green), C3 (blue), C4 (yellow), C5 (magenta), C6 (cyan), C7 (orange), C8 (wheat), C9 (grey).
